# Supplementary material for: Spin–layer locking effects in optical orientation of exciton spin in bilayer WSe2
Source: Springer Nature journal article supplement (doi:10.1038/nphys2848), 2014-01-03
Supplement: 41567_2014_BFnphys2848_MOESM10_ESM.pdf [file 41567_2014_BFnphys2848_MOESM10_ESM.pdf]

# Spin-layer locking effects in optical orientation of exciton spin in bilayer $\text{WSe}_2$

Aaron M. Jones, Hongyi Yu, Jason S. Ross, Philip Klement, Nirmal. J. Ghimire,  
Jiaqiang Yan, David G. Mandrus, Wang Yao, Xiaodong Xu

## S1. Interlayer tunneling in the K valleys of AB stacked bilayers

We first analyze the band edge wavefunctions in the K valleys of two decoupled monolayers with AB stacking order. Here, the conduction band edges originate predominantly from the transition metal  $d_{z^2}$  orbital (with magnetic quantum number  $m = 0$ ) [S1], and the Bloch function can be written as  $\psi_{c\mathbf{K}}^{u,l} = \sum_n e^{i\mathbf{K}\cdot\mathbf{r}_n} d_{m=0}^{u,l}(\mathbf{r}_n)$ . The vector  $\mathbf{r}_n$  is the location of the  $n$ -th metal atom, and superscript  $u$  ( $l$ ) denotes the upper (lower) layer. The valence band edges in the upper (lower) layer originate predominantly from the transition metal  $d_{x^2-y^2} - id_{xy}$  ( $d_{x^2-y^2} + id_{xy}$ ) orbital [S1] with magnetic quantum number  $m = -2$  ( $m = +2$ ). The corresponding Bloch function at  $\mathbf{K}$  is then  $\psi_{v\mathbf{K}}^u = \sum_n e^{i\mathbf{K}\cdot\mathbf{r}_n} d_{m=-2}^u(\mathbf{r}_n)$  ( $\psi_{v\mathbf{K}}^l = \sum_n e^{i\mathbf{K}\cdot\mathbf{r}_n} d_{m=+2}^l(\mathbf{r}_n)$ ), and those at the  $-\mathbf{K}$  point are just their time reversal.

Now we consider nearest neighbor interlayer hopping for the metal atoms, as shown in Fig. S1. The three pairs of interlayer hopping shown by the arrows in Fig. S1 are related by  $2\pi/3$  rotations because of the crystal's three-fold rotational symmetry. The center upper layer atom has position  $\mathbf{r}=0$  while the positions of the three lower layer atoms are denoted as  $\mathbf{r}_1$ ,  $\mathbf{r}_2$  and  $\mathbf{r}_3$ . The hopping amplitude is proportional to the wave function overlap, given by  $\sum_{n=1,2,3} e^{i\mathbf{K}\cdot\mathbf{r}_n} \langle d_{m=0}^l(\mathbf{r}_n) | d_{m=0}^u(0) \rangle$  for the conduction band, and  $\sum_{n=1,2,3} e^{i\mathbf{K}\cdot\mathbf{r}_n} \langle d_{m=+2}^l(\mathbf{r}_n) | d_{m=-2}^u(0) \rangle$  for the valence band.

Writing  $\mathbf{K} = \frac{4\pi}{3a}\hat{\mathbf{x}}$ , then  $e^{i\mathbf{K}\cdot\mathbf{r}_1} = 1$ ,  $e^{i\mathbf{K}\cdot\mathbf{r}_2} = e^{-i2\pi/3}$  and  $e^{i\mathbf{K}\cdot\mathbf{r}_3} = e^{i2\pi/3}$ .  $\langle d_{m'}^l(\mathbf{r}_2) | d_m^u(0) \rangle$  ( $\langle d_{m'}^l(\mathbf{r}_3) | d_m^u(0) \rangle$ ) is then related to  $\langle d_{m'}^l(\mathbf{r}_1) | d_m^u(0) \rangle$  through a  $2\pi/3$  ( $-2\pi/3$ ) rotation operation  $\hat{\mathcal{R}}(\pm\frac{2\pi}{3})$  on  $d_m^u(0)$  and  $d_{m'}^l(\mathbf{r}_1)$ , where  $\hat{\mathcal{R}}(\pm\frac{2\pi}{3})d_m^{u,l} = e^{\mp i\frac{2\pi}{3}m} d_m^{u,l}$ .

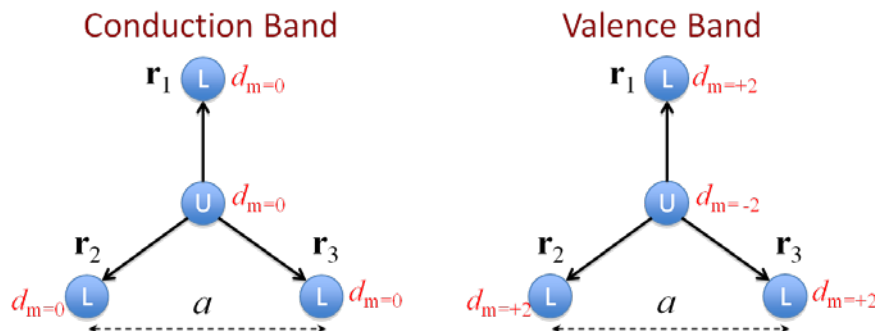

**Figure S1** Nearest neighbor interlayer hopping of metal atoms at the K point in AB-stacked bilayers. Atoms located in the upper (lower) layer are indicated by U (L) while red labels indicate the corresponding orbitals of the K point band edge Bloch functions.

Since  $m = 0$ ,  $\langle d_{m=0}^l(\mathbf{r}_1) | d_{m=0}^u(0) \rangle = \langle d_{m=0}^l(\mathbf{r}_2) | d_{m=0}^u(0) \rangle = \langle d_{m=0}^l(\mathbf{r}_3) | d_{m=0}^u(0) \rangle$  and interlayer hopping for conduction electrons at the K point is:

$$\sum_{n=1,2,3} e^{i\mathbf{K}\cdot\mathbf{r}_n} \langle d_{m=0}^l(\mathbf{r}_n) | d_{m=0}^u(0) \rangle \propto \sum_{n=1,2,3} e^{i\mathbf{K}\cdot\mathbf{r}_n} = 0.$$

For the valence band  $\langle d_{m=+2}^l(\mathbf{r}_2) | d_{m=-2}^u(0) \rangle = e^{i2\pi/3} \langle d_{m=+2}^l(\mathbf{r}_1) | d_{m=-2}^u(0) \rangle$  and  $\langle d_{m=+2}^l(\mathbf{r}_3) | d_{m=-2}^u(0) \rangle = e^{-i2\pi/3} \langle d_{m=+2}^l(\mathbf{r}_1) | d_{m=-2}^u(0) \rangle$ . Thus interlayer hopping for holes at the K point is finite:

$$\sum_{n=1,2,3} e^{i\mathbf{K}\cdot\mathbf{r}_n} \langle d_{m=+2}^l(\mathbf{r}_n) | d_{m=-2}^u(0) \rangle = 3 \langle d_{m=+2}^l(\mathbf{r}_1) | d_{m=-2}^u(0) \rangle.$$

We note that the conduction band edge wavefunctions also have a small component of  $d_{xz}$  and  $d_{yz}$  orbitals [S1]. At the K points in  $\text{WSe}_2$ , they introduce an interlayer tunneling  $t_{\perp} \sim 0.4$  meV [S2]. However, the conduction band also has a spin splitting  $2\lambda \sim 40$  meV [S1]. In AB stacked bilayer, this splitting has a valley and layer dependent sign, and corresponds to the energy cost for the interlayer hopping (see Fig. 1 in main text). Such a large ratio of  $2\lambda/t_{\perp}$  virtually suppresses interlayer hopping of conduction electrons near K points.

## S2. Broadband monolayer and bilayer $\text{WSe}_2$ PL spectra

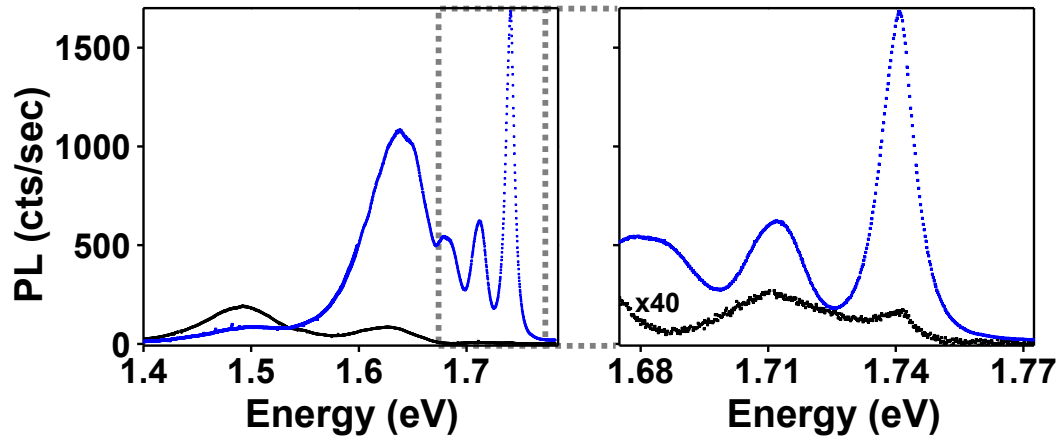

**Figure S2| Comparison of monolayer and bilayer  $\text{WSe}_2$  PL energies.** Left panel: broadband PL spectrum of monolayer (blue) and bilayer (black)  $\text{WSe}_2$ . Right Panel: zoom-in of spectra within dashed boxed of left panel, showing bilayer  $\text{WSe}_2$  data multiplied by a factor of 40. Emission at 1.74 eV for both monolayers and bilayers corresponds to  $X^0$ , while emission at 1.71 eV is from  $X^-$ .

**S3. Broadband bi-WSe<sub>2</sub> differential reflectivity spectrum**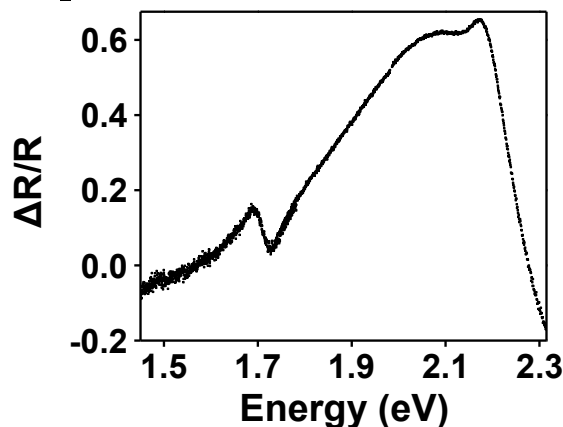

**Figure S3| Broadband bi-WSe<sub>2</sub>  $\Delta R/R$  spectrum.** Broadband differential reflectivity spectrum for bi-WSe<sub>2</sub> at  $V_g = 0$  showing the lowest energy absorption feature at  $\sim 1.7$  eV.

**S4. Gate dependence of bi-WSe<sub>2</sub> peak fitting parameters**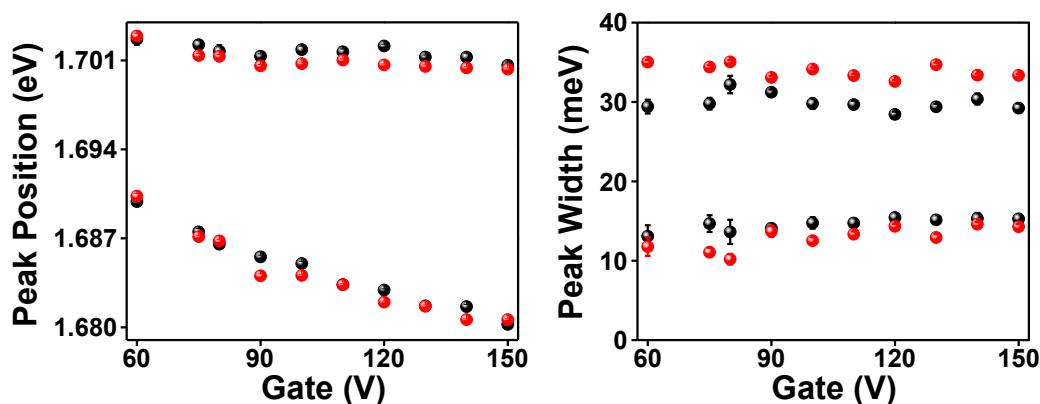

**Figure S4| Gate dependence of doublet peak fitting parameters.** Left panel: peak position as a function of gate voltage for split  $X^-$  peaks. Right panel: corresponding peak widths vs. gate voltage show little variation. Upper and lower data points correspond to peaks I and II, respectively (see main text), while black (red) points correspond to fits for circularly (linearly) polarized excitation.

**S5. Second-harmonic generation in mono-, bi- and tri-layers of WSe<sub>2</sub>**
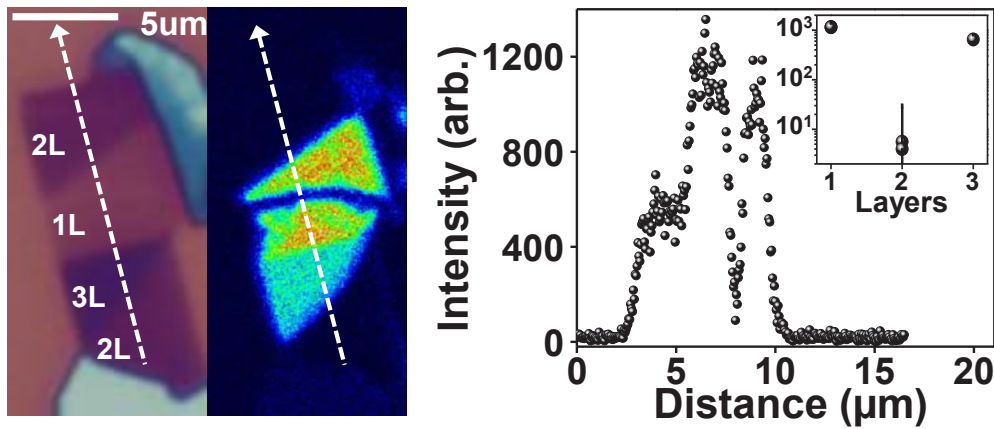

**Figure S5| Layer-dependent second-harmonic generation.** Left panel: optical microscope image of exfoliated WSe<sub>2</sub> with indicated layer number, alongside corresponding map of generated second harmonic intensity. Right panel: second harmonic intensity along line cut indicated by white dashed line in left panel. Inset: second harmonic intensity as a function of number of layers, showing contrast  $>10^2$  between odd/even layers [S3-S5]. The line cut and inset plots show that the SHG signal from bilayers is within the noise of the background signal and can be ignored.

**S6. Bilayer band structure in out-of-plane E-field**

Following the discussions in section S1, at the  $\pm\mathbf{K}$  points, the Hamiltonian of AB stacked bilayers in an out-of-plane electric field  $E$  can be written as [S6],

$$\begin{bmatrix} \Delta - \tau_z s_z \lambda_c + \frac{Ed}{2} & 0 & 0 & 0 \\ 0 & \Delta + \tau_z s_z \lambda_c - \frac{Ed}{2} & 0 & 0 \\ 0 & 0 & -\tau_z s_z \lambda_v + \frac{Ed}{2} & t_{\perp} \\ 0 & 0 & t_{\perp} & \tau_z s_z \lambda_v - \frac{Ed}{2} \end{bmatrix}.$$

The basis is  $\{|d_{z^2}^u\rangle, |d_{z^2}^l\rangle, 1/\sqrt{2}(|d_{x^2-y^2}^u\rangle - i\tau_z |d_{xy}^u\rangle), 1/\sqrt{2}(|d_{x^2-y^2}^l\rangle + i\tau_z |d_{xy}^l\rangle)\}$ , where the superscripts “u” and “l” denote the “upper” and “lower” layer, respectively, with interlayer separation  $d$ . The monolayer band gap is denoted  $\Delta$ , with  $\lambda_c$  ( $\lambda_v$ ) the spin-valley coupling of electrons (holes) [S1]. Interlayer hopping for holes is  $t_{\perp}$ , whereas it vanishes for electrons.  $\tau_z = \pm 1$  is the valley index of bilayer bands and  $s_z$  denotes the Pauli spin matrices. The out-of-plane electric field introduces an energy difference between the upper and lower layer,  $\Delta_{Ec} = Ed$ .

Holes at the K points then have eigenenergies  $\pm\sqrt{(\tau_z s_z \lambda_v - Ed/2)^2 + |t_{\perp}|^2}$ . Due to the large valence band spin splitting  $2\lambda_v$ , we focus only on the higher lying states at the band edge (the lower lying ones are hundreds of meV away). Hole states localized predominantly in the upper layer are:

$$\begin{aligned}
 |\downarrow\rangle'_{\mathbf{K}v} &= \sqrt{1 - |\alpha_1(E)|^2} |\downarrow\rangle_{u,\mathbf{K}v} + \alpha_1(E) |\downarrow\rangle_{l,\mathbf{K}v}, \\
 |\uparrow\rangle'_{-\mathbf{K}v} &= \sqrt{1 - |\alpha_1(E)|^2} |\uparrow\rangle_{u,-\mathbf{K}v} + \alpha_1(E) |\uparrow\rangle_{l,-\mathbf{K}v},
 \end{aligned}$$

and have an eigenenergy  $E_u = \sqrt{(\lambda_v + Ed/2)^2 + |t_\perp|^2}$ ; hole states largely localized in the lower layer are:

$$\begin{aligned}
 |\uparrow\rangle'_{\mathbf{K}v} &= \sqrt{1 - |\alpha_2(E)|^2} |\uparrow\rangle_{l,\mathbf{K}v} + \alpha_2(E) |\uparrow\rangle_{u,\mathbf{K}v}, \\
 |\downarrow\rangle'_{-\mathbf{K}v} &= \sqrt{1 - |\alpha_2(E)|^2} |\downarrow\rangle_{l,-\mathbf{K}v} + \alpha_2(E) |\downarrow\rangle_{u,-\mathbf{K}v},
 \end{aligned}$$

and have an eigenenergy  $E_l = \sqrt{(\lambda_v - Ed/2)^2 + |t_\perp|^2}$  (see Fig. S6). Here we use the

shorthand notation  $|\downarrow\rangle_{u,\mathbf{K}v} \equiv \frac{|a_{x^2-y^2}^u\rangle - i|a_{xy}^u\rangle}{\sqrt{2}} \otimes |\downarrow\rangle_{\mathbf{K}}$ . The coefficients  $\alpha_1(E) = t_\perp / \sqrt{(E_u + \lambda_v + \frac{Ed}{2})^2 + |t_\perp|^2}$  and  $\alpha_2(E) = t_\perp / \sqrt{(E_l + \lambda_v - \frac{Ed}{2})^2 + |t_\perp|^2}$ . The electric field thus induces a spin splitting at the valence band edge at the K points  $\Delta_{Ev} = E_u - E_l$ , which can be approximated as  $\Delta_{Ev} \approx \frac{\lambda_v}{\sqrt{\lambda_v^2 + |t_\perp|^2}} Ed$  when  $Ed \ll \lambda_v$ , whereas for the

conduction bands, we simply have the spin splitting  $\Delta_{Ec} = Ed$ . Our white light differential reflectivity measurements on monolayer WSe<sub>2</sub> show  $2\lambda_v = 450$  meV, in good agreement with the first principle calculations in Ref. [S6] which give  $2\lambda_v = 456$  meV. The same work extracts an interlayer hopping strength of  $2t_\perp = 134$  meV for the valence band edges at the K points of bilayer WSe<sub>2</sub>, from which we calculate  $\Delta_{Ev} \approx 0.96\Delta_{Ec}$ , and  $\alpha_1(E) \approx \alpha_2(E) \approx 0.14$  for  $Ed \ll \lambda_v$ . The resulting difference between conduction and valence band shifts,  $\Delta_{Ec} - \Delta_{Ev}$ , contributes to the trion splitting observed at large gate voltages (see Fig. 3 and 4 in main text).

It should be noted that the interlayer hole hopping  $t_\perp$  will induce a change in the direct band gap at the K points of bilayers from that of monolayers. At zero electric field, we have the band gap values  $\Delta - \lambda_c - \lambda_v$  and  $\Delta - \lambda_c - \sqrt{\lambda_v^2 + |t_\perp|^2}$  for monolayers and bilayers, respectively. In WSe<sub>2</sub>, because of the large  $\lambda_v/t_\perp$  ratio, we expect a small difference between the monolayer and bilayer direct band gap at K points:  $\sqrt{\lambda_v^2 + |t_\perp|^2} - \lambda_v \sim 9$  meV, which is much smaller than the trion charging energy of  $\sim 30$  meV. As a result, the resonances of excitons and trions formed at the K valleys of bilayers are nearly aligned with those of monolayers (Fig. S2). In contrast, in MoSe<sub>2</sub> the smaller value of  $2\lambda_v = 182$  meV gives rise to a larger redshift of the exciton and trion lines in bilayers when compared to monolayers, as observed (see e.g. supplementary information of [S7]).

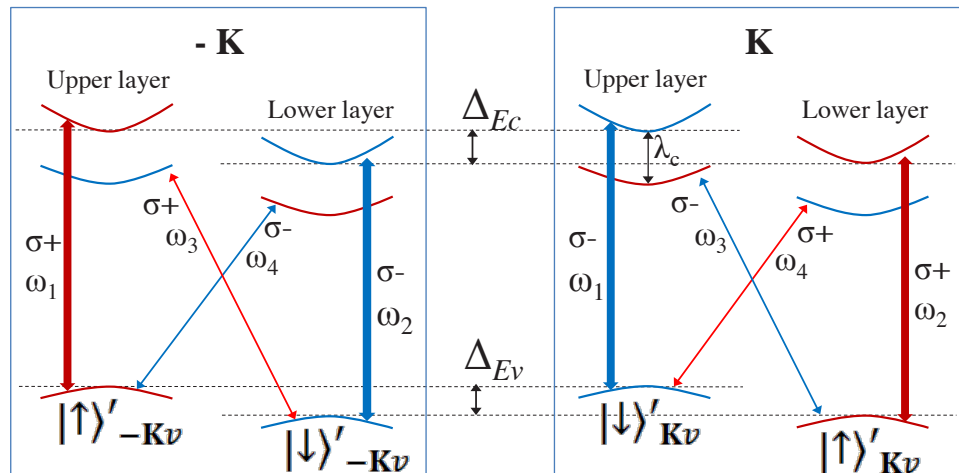

**Figure S6** Band structure of bi-WSe<sub>2</sub> under applied electric field. The creation process of electron-hole pairs at resonances  $\omega_1$ ,  $\omega_2$ ,  $\omega_3$  and  $\omega_4$  via  $\sigma^+$  ( $\sigma^-$ ) polarized excitation is denoted by red (blue) double arrows. Arrow thickness denotes transition strength.  $\Delta_{Ec}$  ( $\Delta_{Ev}$ ) is the interlayer conduction (valence) band splitting under the effect of an out-of-plane electric field.

### **S7. PL emission under circularly polarized excitation**

An applied  $\sigma^+$  ( $\sigma^-$ ) polarized laser can excite electron-hole pairs through four transitions, as illustrated by red (blue) double arrows in Fig. S6. The arrow thickness denotes strength of the transition. The weak cross transitions denoted by thin arrows are due to the fact that the layer polarization of hole states near K points is  $\sim 96\%$ , not fully polarized, a residual effect of the interlayer hopping.

Below we consider applying an incident laser with  $\sigma^+$  polarization, which will excite electron-hole pairs through the four transitions denoted by the red arrows in Fig. S7. In emission,  $\sigma^+$  PL will come predominantly from the two transitions marked by the thicker arrows with energies  $\omega_1$  and  $\omega_2$ . Since the difference between  $\Delta_{Ev}$  and  $\Delta_{Ec}$  contributes to the difference between  $\omega_1$  and  $\omega_2$ , in sufficiently large electric fields, this splitting may become resolvable.

The  $\sigma^-$  PL signal component is a consequence of electron spin relaxation (intra- and inter-valley). We expect that intra-valley spin relaxation is more efficient than inter-valley relaxation as the latter involves a simultaneous spin and valley flip. When  $\Delta_{Ev}$  and  $\Delta_{Ec}$  are much larger than the temperature, the spin relaxation channel from higher energy to lower energy states by phonon emission will also be much more efficient than the backward channel requiring phonon absorption. Thus the dominant spin relaxation channel is the one-way channel depicted by the green dotted arrow in Fig. S7. Therefore, we expect  $\sigma^-$  PL at resonance  $\omega_2$  to be much larger than at  $\omega_1$ .

In summary, under  $\sigma^+$  excitation we expect comparable  $\sigma^+$  PL emission at both  $\omega_1$  and  $\omega_2$ , while  $\sigma^-$  PL emission resulting from carrier spin relaxation is predominantly at

the lower resonance  $\omega_2$ . When  $\omega_1 - \omega_2$  is smaller than the peak linewidth, this manifests as a red shift of the  $\sigma^-$  PL.

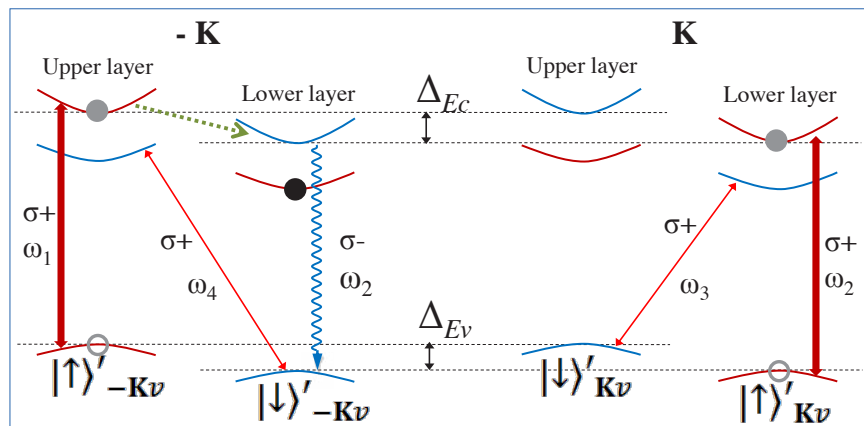

**Figure S7| Allowed excitation and emission channels for  $\sigma^+$  polarized excitation.** Transitions driven by  $\sigma^+$  polarized excitation are denoted by red arrows, with line thickness denoting transition strength. Gray circles denote photo-excited electron-hole pairs at either the K or -K valley. The black circle denotes the excess electron in X<sup>-</sup> trion configurations. The dominant emission channels are  $\sigma^+$  polarized at frequencies  $\omega_1$  and  $\omega_2$ . Emission of  $\sigma^-$  PL at  $\omega_2$  is indicated by the wavy blue arrow which becomes possible following the intra-valley spin flip of the photo-excited electron accompanied by emission of energy into the environment (green dashed arrow). The spin flipped electron can then recombine with holes photo-excited through the weak cross transition ( $\omega_4$ ) and emit a  $\sigma^-$  photon.

### S8. X<sup>-</sup> peak splitting

In the experiment a doublet peak feature is observed in the X<sup>-</sup> spectrum for large gate voltages (main text Figs. 3a and 4a). We attribute this to the two different X<sup>-</sup> configurations shown in Fig. S8a, where the X<sup>-</sup> energy can be obtained from the X<sup>0</sup> resonance by subtracting the trion charging energy. In the  $\omega_1$  configuration (top panel), the excess electron and the neutral exciton are in different layers (interlayer trion) and we write its charging energy as  $E_{c1}$ . In contrast, for the  $\omega_2$  configuration (bottom panel), the excess electron and neutral exciton are in the same layer (intralayer trion) and we write its charging energy as  $E_{c2}$ . Because of the layer separation,  $E_{c1} < E_{c2}$  (see Fig. S8a). Thus, in the X<sup>-</sup> spectrum the peak splitting is  $\omega_1 - \omega_2 = (\Delta_{Ec} - \Delta_{Ev}) + (E_{c2} - E_{c1})$ . Since the layer separation (7 Å) is comparable to the exciton Bohr radius ( $a_B \sim 1$  nm) [S8], and the monolayer trion charging energy is  $E_{c2} \approx 30$  meV, we expect the charging energy difference  $E_{c2} - E_{c1}$  can be as large as several meV.

In contrast, for the X<sup>+</sup> spectrum, the  $\omega_1$  configuration corresponds to *intralayer* trions with the excess hole and neutral exciton in the same layer (top panel Fig. S8b), and a charging energy  $E_{c1}$ . For the  $\omega_2$  configuration we have *interlayer* trions with the excess hole and neutral exciton in different layers (bottom panel Fig. S8b), and a charging energy  $E_{c2}$ . Now  $E_{c1} > E_{c2}$ , and the peak splitting is  $\omega_1 - \omega_2 = (\Delta_{Ec} - \Delta_{Ev}) -$

$(E_{c1} - E_{c2})$ , where the two contributions largely cancel. Consequently, the peak splitting  $|\omega_1 - \omega_2|$  is larger for  $X^-$  than  $X^+$  and thus more readily observed.

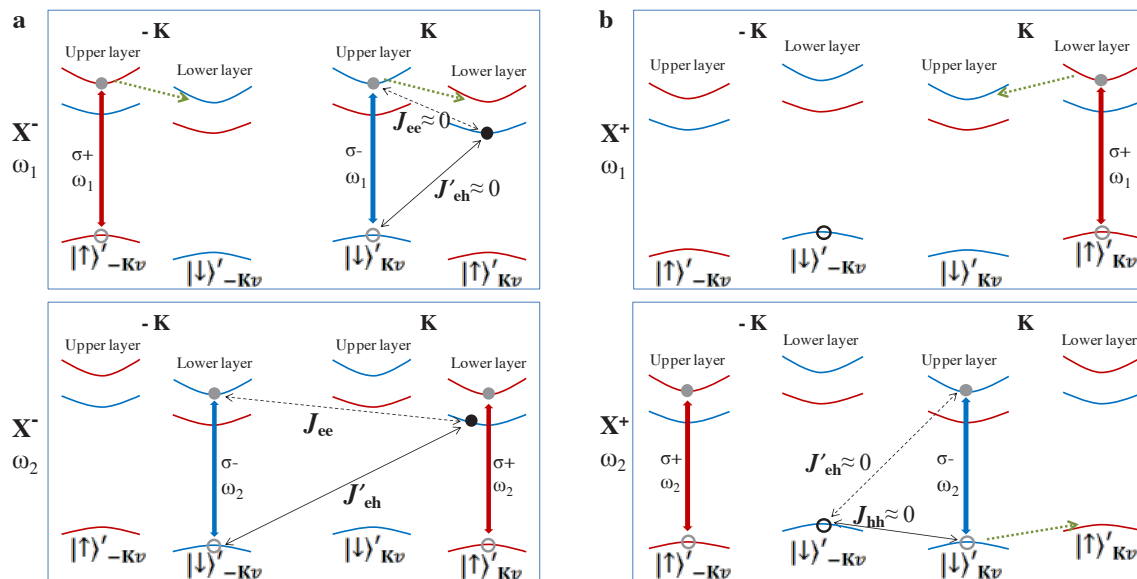

**Figure S8I  $X^-$  and  $X^+$  configurations under linearly polarized excitation.** **a**,  $X^-$  configurations with emission energy  $\omega_1$  (upper panel) and  $\omega_2$  (lower panel), where an electron-hole pair (gray dot and circle) in a coherent superposition in the two valleys can lead to linearly polarized emission. Black dot denotes the excess electron in the lowest energy band (lower layer). Dashed green arrows represent spin relaxation processes and black double arrows indicate exchange interactions. Intervalley coherence at  $\omega_1$  (interlayer trions) is less affected by the excess electron than at  $\omega_2$  (intralayer trions) since the electron is on the layer opposite the recombining electron-hole pair. **b**, For  $X^+$ , the excess hole is in the lowest energy band (the lower layer). A coherent superposition in  $\pm K$  valleys is not possible for intralayer positive trions at  $\omega_1$  (top panel) since the excess hole comprising the trion resides within the same layer, as in monolayers [S9]. For interlayer positive trions where the electron-hole pair is in the upper layer, opposite the excess hole (bottom panel), a valley superposition is allowed and experiences negligible exchange interactions.

**S9. PL emission for linearly polarized excitation**

A linearly polarized incident laser will create electron-hole pairs in a coherent superposition of states at K and  $-K$ . If the intervalley coherence can be preserved until electron-hole recombination, linearly polarized PL is emitted. Bilayers of transition metal dichalcogenides are qualitatively different from monolayers because of the additional layer degree of freedom. Below we analyze how valley coherence of a photo-excited electron-hole pair can be affected by the excess electron or hole in the  $X^-$  or  $X^+$  configuration in bilayers. We consider the condition where the electric field induced Zeeman splitting between  $\Delta_{Ev}$  and  $\Delta_{Ec}$  is large, such that the excess electron (hole) is in the lower energy layer, as denoted by the black filled (open) circle in the lowest (highest) conduction (valence) band in Fig. S8a (Fig. S8b).



$X^-$  emission occurs at either energy  $\omega_1$  or  $\omega_2$ . We first look at the emission at  $\omega_2$  which comes from the intralayer trion configuration shown in lower panel of Fig. S8a, i.e. the photo-excited electron-hole pair (gray circles) is in same layer as the excess electron. Non-zero exchange interactions with the excess electron can destroy the intervalley coherence of the electron-hole pair, just as in the monolayer case [S9]. Hence, linear polarization is largely suppressed at this energy and one expects both co-polarized (i.e. identical to the excitation polarization) and cross-polarized (i.e. orthogonal to the excitation polarization) PL emission from intralayer trions. We now turn to  $X^-$  emission at  $\omega_1$ , which comes from the interlayer trion configuration depicted in the upper panel of Fig. S8a. With the photo-excited electron-hole pair in the layer opposite the excess electron, the exchange interaction is substantially suppressed, such that intervalley coherence can be preserved and large linearly polarized PL can be observed at  $\omega_1$ . This is in good agreement with the observed linear polarization behavior of the  $X^-$  doublet with applied gate.

In addition to the above exchange interactions which suppress linear polarization at  $\omega_2$ , carrier spin relaxation as discussed in the previous section (green dotted arrows in Fig. S8a) will contribute unpolarized emission at  $\omega_2$  as well, further suppressing linearly polarized PL at this emission energy.

For the  $X^+$  trion the situation is different. Emission at  $\omega_1$  is from the intralayer trion configuration shown in upper panel of Fig. S8b, where the photo-excited electron-hole pair is in the same layer as the excess hole. Similar to the monolayer case, because of the Pauli exclusion principle,  $X^+$  PL cannot exhibit linear polarization at  $\omega_1$  [S9]. Emission at  $\omega_2$  is from the interlayer trion configuration shown in the lower panel of Fig. S8b, where the photo-excited electron-hole pair is in the layer opposite the excess hole. Linearly polarized emission is thus allowed at  $\omega_2$ . As before, interlayer exchange interactions are strongly suppressed so that at this emission energy, the major depolarizing mechanism is the spin-relaxation of carriers denoted by the dotted green arrow.

### **S10. Supplementary References**

- S1 Liu, G.-B., Shan, W.-Y., Yao, Y., Yao, W. & Xiao, D. A three-band tight-binding model for monolayers of group-VIB transition metal dichalcogenides. *Physical Review B* **88**, 085433 (2013).
- S2 Gui-Bin Liu, unpublished work.
- S3 Kumar, N. *et al.* Second harmonic microscopy of monolayer MoS<sub>2</sub>. *Physical Review B* **87**, 161403 (2013).
- S4 Zeng, H. *et al.* Optical signature of symmetry variations and spin-valley coupling in atomically thin tungsten dichalcogenides. *Scientific reports* **3**, 1608 (2013).
- S5 Malard, L. M., Alencar, T. V., Barboza, A. P. M., Mak, K. F. & De Paula, A. M. Observation of intense second harmonic generation from MoS<sub>2</sub> atomic crystals. *Physical Review B* **87**, 201401 (2013).
- S6 Gong, Z. *et al.* Magnetoelectric effects and valley-controlled spin quantum gates in transition metal dichalcogenide bilayers. *Nature Communications* **4**, 15 (2013).
- S7 Ross, J. S. *et al.* Electrical control of neutral and charged excitons in a monolayer semiconductor. *Nature communications* **4**, 1474 (2013).

- S8 Feng, J., Qian, X., Huang, C.-W. & Li, J. Strain-engineered artificial atom as a broad-spectrum solar energy funnel. *Nature Photonics* **6**, 866–872 (2012).
- S9 Jones, A. M. *et al.* Optical generation of excitonic valley coherence in monolayer WSe<sub>2</sub>. *Nature Nanotechnology* **12** (2013).doi:10.1038/nnano.2013.151
